# Supplementary material for: The quality of clinical practice guidelines in traditional medicine in Korea: appraisal using the AGREE II instrument
Source: Springer Nature journal article supplement (doi:10.1186/s13012-015-0294-1), 2015-07-27
Supplement: MOESM1 [file 9773120]

**Additional file 1.** Search terms used in titles and abstracts

|    | <b>Korean search term</b>              |
|----|----------------------------------------|
| #1 | 임상 or 진료 or 진단 or 치료 or 약물 or 예방 or 관리 |
| #2 | 지침 or 권고 or 합의                         |
| #3 | 한의학 or 전통의학                            |
| #4 | #1 and #2 and #3                       |
