# Supplementary material for: The quality of clinical practice guidelines in traditional medicine in Korea: appraisal using the AGREE II instrument
Source: Springer Nature journal article supplement (doi:10.1186/s13012-015-0294-1), 2015-07-27
Supplement: MOESM2 [file 9773120]

## Additional file 2. The individual scores of the appraisers

| Domain                   | Guideline * | CPG 1 |   |   |   |   | CPG 2 |   |   |   |   | CPG 3 |   |   |   |   | CPG 4 |   |   |   |   | CPG 5 |   |   |   |   | CPG 6 |   |   |   |   | CPG 7 |   |   |   |   | CPG 8 |   |   |   |   |   |
|--------------------------|-------------|-------|---|---|---|---|-------|---|---|---|---|-------|---|---|---|---|-------|---|---|---|---|-------|---|---|---|---|-------|---|---|---|---|-------|---|---|---|---|-------|---|---|---|---|---|
|                          | Appraiser   | 1     | 2 | 3 | 4 | 5 | 1     | 2 | 3 | 4 | 5 | 1     | 2 | 3 | 4 | 5 | 1     | 2 | 3 | 4 | 5 | 1     | 2 | 3 | 4 | 5 | 1     | 2 | 3 | 4 | 5 | 1     | 2 | 3 | 4 | 5 | 1     | 2 | 3 | 4 | 5 |   |
| Scope and purpose        | Item 1      | 4     | 4 | 5 | 5 | 6 | 4     | 5 | 5 | 5 | 6 | 4     | 5 | 5 | 5 | 6 | 6     | 6 | 7 | 6 | 4 | 4     | 3 | 3 | 4 | 5 | 6     | 6 | 7 | 7 | 5 | 6     | 6 | 7 | 7 | 5 | 6     | 7 | 6 | 7 | 5 |   |
|                          | Item 2      | 3     | 3 | 3 | 2 | 3 | 3     | 3 | 3 | 2 | 3 | 3     | 3 | 3 | 2 | 3 | 3     | 2 | 3 | 2 | 3 | 3     | 2 | 3 | 4 | 2 | 6     | 6 | 7 | 4 | 5 | 6     | 5 | 7 | 5 | 6 | 7     | 6 | 7 | 5 | 6 |   |
|                          | Item 3      | 4     | 4 | 4 | 2 | 4 | 4     | 4 | 4 | 4 | 4 | 4     | 4 | 4 | 4 | 2 | 4     | 4 | 4 | 4 | 2 | 3     | 5 | 4 | 5 | 5 | 4     | 6 | 6 | 7 | 6 | 5     | 6 | 5 | 7 | 5 | 4     | 6 | 5 | 7 | 5 | 5 |
| Stakeholder involvement  | Item 4      | 4     | 4 | 3 | 5 | 4 | 4     | 4 | 3 | 5 | 4 | 4     | 4 | 3 | 4 | 4 | 5     | 5 | 4 | 6 | 4 | 4     | 4 | 2 | 2 | 4 | 6     | 7 | 7 | 7 | 7 | 6     | 7 | 7 | 7 | 7 | 6     | 7 | 7 | 7 | 7 |   |
|                          | Item 5      | 3     | 4 | 1 | 3 | 2 | 3     | 4 | 1 | 5 | 2 | 3     | 4 | 1 | 5 | 2 | 5     | 5 | 3 | 6 | 5 | 1     | 2 | 1 | 1 | 1 | 4     | 4 | 3 | 3 | 4 | 3     | 4 | 3 | 3 | 2 | 4     | 5 | 3 | 4 | 3 |   |
|                          | Item 6      | 4     | 5 | 3 | 4 | 3 | 4     | 6 | 3 | 4 | 3 | 3     | 4 | 3 | 3 | 3 | 6     | 5 | 6 | 4 | 3 | 6     | 7 | 3 | 3 | 7 | 6     | 6 | 7 | 7 | 6 | 6     | 5 | 7 | 7 | 6 | 6     | 6 | 6 | 6 | 7 | 6 |
| Rigor of development     | Item 7      | 5     | 5 | 5 | 5 | 4 | 5     | 5 | 5 | 4 | 4 | 5     | 5 | 5 | 5 | 3 | 2     | 2 | 2 | 1 | 1 | 5     | 5 | 4 | 4 | 4 | 6     | 7 | 6 | 5 | 6 | 6     | 5 | 5 | 7 | 6 | 6     | 7 | 6 | 4 | 6 |   |
|                          | Item 8      | 4     | 4 | 1 | 4 | 2 | 3     | 4 | 1 | 4 | 2 | 3     | 4 | 1 | 4 | 2 | 1     | 2 | 2 | 1 | 3 | 1     | 2 | 1 | 1 | 2 | 5     | 6 | 7 | 5 | 5 | 5     | 6 | 7 | 7 | 6 | 5     | 6 | 7 | 4 | 5 |   |
|                          | Item 9      | 4     | 6 | 5 | 1 | 6 | 3     | 3 | 5 | 1 | 5 | 3     | 3 | 5 | 1 | 5 | 1     | 1 | 3 | 1 | 5 | 2     | 2 | 5 | 5 | 6 | 5     | 7 | 6 | 6 | 5 | 7     | 7 | 6 | 6 | 6 | 6     | 7 | 6 | 6 |   |   |
|                          | Item 10     | 3     | 3 | 1 | 2 | 3 | 3     | 2 | 1 | 2 | 3 | 3     | 1 | 1 | 2 | 3 | 1     | 1 | 1 | 1 | 3 | 1     | 1 | 1 | 1 | 3 | 5     | 5 | 4 | 3 | 5 | 5     | 5 | 4 | 3 | 5 | 5     | 5 | 5 | 6 | 5 |   |
|                          | Item 11     | 3     | 3 | 3 | 4 | 3 | 4     | 5 | 3 | 4 | 3 | 3     | 5 | 3 | 4 | 3 | 4     | 5 | 4 | 1 | 1 | 3     | 2 | 3 | 4 | 2 | 4     | 4 | 6 | 5 | 4 | 3     | 4 | 6 | 4 | 4 | 4     | 4 | 4 | 7 | 4 | 4 |
|                          | Item 12     | 1     | 1 | 1 | 3 | 1 | 1     | 1 | 4 | 4 | 1 | 1     | 1 | 1 | 3 | 1 | 2     | 2 | 4 | 2 | 4 | 1     | 1 | 3 | 4 | 4 | 3     | 6 | 7 | 5 | 6 | 3     | 5 | 7 | 5 | 6 | 5     | 6 | 7 | 5 | 5 |   |
|                          | Item 13     | 3     | 2 | 3 | 3 | 2 | 3     | 2 | 3 | 3 | 2 | 3     | 3 | 2 | 3 | 3 | 2     | 3 | 3 | 2 | 4 | 3     | 2 | 2 | 1 | 1 | 2     | 5 | 7 | 4 | 3 | 2     | 5 | 7 | 4 | 3 | 2     | 5 | 7 | 4 | 3 | 2 |
| Item 14                  | 1           | 1     | 1 | 1 | 2 | 1 | 1     | 1 | 1 | 2 | 1 | 1     | 1 | 1 | 2 | 1 | 1     | 1 | 1 | 1 | 1 | 1     | 1 | 1 | 1 | 6 | 6     | 5 | 5 | 5 | 6 | 6     | 5 | 5 | 5 | 6 | 6     | 5 | 5 | 6 | 5 | 5 |
| Clarity and presentation | Item 15     | 4     | 3 | 3 | 2 | 5 | 3     | 4 | 3 | 3 | 5 | 3     | 4 | 3 | 2 | 5 | 3     | 2 | 3 | 3 | 3 | 3     | 2 | 3 | 3 | 5 | 6     | 6 | 7 | 4 | 6 | 5     | 6 | 7 | 5 | 5 | 6     | 6 | 7 | 5 | 6 |   |
|                          | Item 16     | 4     | 4 | 4 | 4 | 3 | 4     | 3 | 4 | 4 | 3 | 5     | 3 | 4 | 4 | 3 | 5     | 6 | 1 | 3 | 4 | 5     | 3 | 5 | 5 | 4 | 5     | 5 | 3 | 3 | 3 | 4     | 5 | 5 | 6 | 4 | 5     | 5 | 4 | 5 | 4 |   |
|                          | Item 17     | 6     | 6 | 7 | 4 | 6 | 6     | 6 | 7 | 4 | 6 | 6     | 6 | 7 | 4 | 6 | 5     | 5 | 6 | 3 | 3 | 5     | 2 | 6 | 6 | 6 | 7     | 7 | 7 | 7 | 7 | 7     | 7 | 7 | 7 | 7 | 7     | 7 | 7 | 7 | 7 | 7 |
| Applicability            | Item 18     | 3     | 3 | 3 | 1 | 4 | 1     | 1 | 3 | 5 | 4 | 1     | 1 | 3 | 1 | 4 | 1     | 1 | 3 | 6 | 1 | 1     | 1 | 3 | 4 | 6 | 2     | 5 | 4 | 3 | 3 | 3     | 5 | 4 | 3 | 3 | 4     | 5 | 4 | 2 | 3 |   |
|                          | Item 19     | 5     | 5 | 1 | 1 | 4 | 5     | 6 | 1 | 1 | 4 | 5     | 5 | 1 | 1 | 4 | 1     | 1 | 1 | 6 | 3 | 1     | 1 | 1 | 1 | 6 | 5     | 6 | 3 | 1 | 5 | 5     | 6 | 3 | 4 | 5 | 5     | 6 | 3 | 4 | 6 |   |
|                          | Item 20     | 1     | 1 | 1 | 1 | 1 | 1     | 1 | 1 | 1 | 1 | 1     | 1 | 1 | 1 | 1 | 1     | 1 | 1 | 1 | 1 | 1     | 1 | 1 | 1 | 1 | 5     | 1 | 1 | 1 | 1 | 1     | 1 | 1 | 1 | 1 | 1     | 1 | 1 | 1 | 1 | 1 |
|                          | Item 21     | 1     | 1 | 1 | 1 | 1 | 1     | 1 | 1 | 1 | 1 | 1     | 1 | 1 | 1 | 1 | 1     | 1 | 1 | 1 | 1 | 1     | 1 | 1 | 1 | 1 | 1     | 1 | 1 | 1 | 1 | 1     | 1 | 1 | 1 | 1 | 1     | 1 | 1 | 1 | 1 | 1 |
| Editorial independence   | Item 22     | 4     | 4 | 3 | 4 | 3 | 4     | 4 | 3 | 3 | 3 | 4     | 4 | 3 | 4 | 3 | 4     | 4 | 3 | 1 | 1 | 1     | 1 | 2 | 1 | 1 | 1     | 7 | 7 | 7 | 7 | 5     | 7 | 7 | 7 | 7 | 5     | 7 | 7 | 7 | 5 |   |
|                          | Item 23     | 1     | 1 | 1 | 1 | 1 | 1     | 1 | 1 | 1 | 1 | 1     | 1 | 1 | 1 | 1 | 1     | 1 | 1 | 1 | 1 | 1     | 1 | 1 | 1 | 1 | 7     | 7 | 7 | 7 | 5 | 7     | 7 | 7 | 7 | 5 | 7     | 7 | 7 | 6 | 7 | 5 |

CPG: clinical practice guideline

\*Guidelines were divided into conditions: CPG 1: Knee pain; CPG 2: Neck pain; CPG3: Low back pain; CPG4: Hwa-byung(火病); CPG5: Low fertility; CPG6: Lumbar herninated intervertebral disc; CPG7: Atopic dermatitis; CPG8: Bell's palsy
